# Supplementary material
Source: PubMed Central journal article supplement (PMC3106226)
Supplement: NIHMS291964-supplement-Supp1.pdf [file NIHMS291964-supplement-Supp1.pdf]

**Supplemental Table 1.** Transcription factors with discrete expression within the mouse SCN at P0.

| Gene    | Entrez Gene ID | Family   | SCN | Potentially in SCN | Boundary | In Situ Verified | Source                        | ABA E18 Expression Confirmation | ABA Adult Expression Confirmation |
|---------|----------------|----------|-----|--------------------|----------|------------------|-------------------------------|---------------------------------|-----------------------------------|
| Sox2    | 20674          | HMG      | X   |                    |          |                  |                               | X                               | X                                 |
| Sox5    | 20678          | HMG      | X   |                    |          |                  |                               |                                 |                                   |
| Zfhx3   | 11906          | Homeobox | X   |                    |          |                  |                               | X                               | X                                 |
| Hmx3    | 15373          | Homeobox | X   |                    |          |                  |                               |                                 |                                   |
| Lhx1    | 16869          | Homeobox | X   |                    |          | X                |                               | X                               | X                                 |
| Six3    | 20473          | Homeobox | X   |                    |          | X                |                               | X                               |                                   |
| Six6*   | 20476          | Homeobox | X   |                    |          | X                | Jean et al., 1999             |                                 |                                   |
| Vax1    | 22326          | Homeobox | X   |                    |          |                  |                               |                                 | X                                 |
| Rora    | 19883          | Nucrec   | X   |                    |          | X                |                               | X                               | X                                 |
| Rorb*   | 225998         | Nucrec   | X   |                    |          | X                | Schaeren-Wiemers et al., 1997 | X                               | X                                 |
| Nr4a1   | 15370          | Nucrec   | X   |                    |          |                  |                               | X                               | X                                 |
| Pou2f2* | 18987          | Pou      | X   |                    |          | X                | Rivkees et al., 1992          | X                               |                                   |
| Peg3    | 18616          | ZN C2H2  | X   |                    |          |                  |                               |                                 |                                   |
| Tcf12   | 21406          | bHLH     |     | X                  |          |                  |                               |                                 |                                   |
| Olig2   | 50913          | bHLH     |     | X                  |          |                  |                               |                                 |                                   |
| Sox14   | 20669          | HMG      |     | X                  |          |                  |                               |                                 |                                   |
| Dlx2    | 13392          | Homeobox |     | X                  |          |                  |                               | X                               | X                                 |
| Dlx5    | 13395          | Homeobox |     | X                  |          |                  |                               |                                 |                                   |
| Lhx9    | 16876          | Homeobox |     | X                  |          |                  |                               |                                 |                                   |
| Sox4    | 20677          | HMG      |     |                    | X        |                  |                               | X                               |                                   |
| Dlx1    | 13390          | Homeobox |     |                    | X        |                  |                               | X                               |                                   |
| Isl1    | 16392          | Homeobox |     |                    | X        |                  |                               | X                               | X                                 |
| Lhx2*   | 16870          | Homeobox |     |                    |          | X                | Menger et al., 2005           | X                               |                                   |
| Lhx5    | 16873          | Homeobox |     |                    | X        |                  |                               | X                               |                                   |
| Lhx8    | 16875          | Homeobox |     |                    | X        |                  |                               | X                               |                                   |
| Otp     | 18420          | Homeobox |     |                    | X        | X                |                               | X                               |                                   |
| Pbx3    | 18516          | Homeobox |     |                    | X        |                  |                               | X                               |                                   |
| Nr2f2   | 11819          | Nucrec   |     |                    | X        |                  |                               | X                               |                                   |

List of 28 transcription factors identified as within, potentially within, or directly adjacent to the postnatal mouse SCN obtained from re-examination of a genome-scale transcription factor expression database (Gray et al., 2004) and other published work (\*Rivkees et al., 1992; Schaeren-Wiemers et al., 1997; Jean et al., 1999; Menger et al., 2005). Genes highlighted in grey were further assessed for precise expression within the SCN region. The last two columns represent those genes whose expression was further confirmed in the Allen Brain Atlas either E18 (ABA E18) or Adult (ABA Adult) (Lein et al., 2007). bHLH – basic helix-loop-helix, HMG – high mobility group, Nucrec – nuclear receptor, ZN-Zinc finger type C2H2.

**Supplemental Table 2.** Transcription factors with discrete mRNA expression within the mouse anterior hypothalamus at E13.5.

| Gene    | Entrez Gene ID | Family   | Anterior Hypothalamus | Boundary | In Situ Verified | Source                | Database Expression Confirmation |
|---------|----------------|----------|-----------------------|----------|------------------|-----------------------|----------------------------------|
| Npas1   | 18142          | bHLH     | X                     |          |                  |                       |                                  |
| Olig2   | 50913          | bHLH     | X                     |          |                  |                       | X                                |
| Baz2a   | 116848         | Bromo    | X                     |          |                  |                       | X                                |
| Baz2b   | 227940         | Bromo    | X                     |          |                  |                       |                                  |
| Smarcc1 | 20588          | Bromo    | X                     |          |                  |                       |                                  |
| Smarcd3 | 66993          | Bromo    | X                     |          |                  |                       |                                  |
| FoxD3   | 15221          | Forkhead | X                     |          |                  |                       |                                  |
| FoxO1   | 56458          | Forkhead | X                     |          |                  |                       |                                  |
| Foxp4   | 74123          | Forkhead | X                     |          |                  |                       | X                                |
| Hmgb1   | 15289          | HMG      | X                     |          |                  |                       | X                                |
| Hmgb2   | 97165          | HMG      | X                     |          |                  |                       | X                                |
| Sox21   | 223227         | HMG      | X                     |          |                  |                       | X                                |
| Sox4    | 20677          | HMG      | X                     |          |                  |                       |                                  |
| Sox5    | 20678          | HMG      | X                     |          |                  |                       | X                                |
| Tcf7l2  | 21416          | HMG      | X                     |          |                  |                       | X                                |
| Atbf1   | 11906          | Homeobox | X                     |          |                  |                       | X                                |
| Dlx1    | 13390          | Homeobox | X                     |          |                  |                       | X                                |
| Dlx2    | 13392          | Homeobox | X                     |          | X                |                       | X                                |
| Dlx5    | 13395          | Homeobox | X                     |          |                  |                       | X                                |
| Hes1    | 15205          | Homeobox | X                     |          |                  |                       | X                                |
| Hmx2*   | 15372          | Homeobox | X                     |          |                  | Wang and Lufkin, 2000 | X                                |
| Hmx3    | 15373          | Homeobox | X                     |          |                  |                       |                                  |
| HoxD3   | 15434          | Homeobox | X                     |          |                  |                       |                                  |
| Lhx1    | 16869          | Homeobox | X                     |          | X                |                       | X                                |
| Lhx2    | 16870          | Homeobox | X                     |          |                  |                       | X                                |
| Lhx4    | 16872          | Homeobox | X                     |          |                  |                       |                                  |
| Nkx2.1  | 21869          | Homeobox | X                     |          |                  |                       | X                                |
| Six3    | 20473          | Homeobox | X                     |          | X                |                       | X                                |
| Six6*   | 20476          | Homeobox | X                     |          | X                | Jean et al., 1999     | X                                |

**Supplemental Table 2 (Con't).** Transcription factors with discrete mRNA expression within the mouse anterior hypothalamus at E13.5.

| Gene   | Entrez Gene ID | Family   | Anterior Hypothalamus | Boundary | In Situ Verified | Source | Database Expression Confirmation |
|--------|----------------|----------|-----------------------|----------|------------------|--------|----------------------------------|
| Tef2   | 21410          | Homeobox | X                     |          |                  |        |                                  |
| Vax1   | 22326          | Homeobox | X                     |          |                  |        | X                                |
| Crip2  | 68337          | LIM      | X                     |          |                  |        | X                                |
| Csrp2  | 13008          | LIM      | X                     |          |                  |        |                                  |
| Lmo4   | 16911          | LIM      | X                     |          |                  |        | X                                |
| Zyx    | 22793          | LIM      | X                     |          |                  |        |                                  |
| Nr1h2  | 22260          | Nucrec   | X                     |          |                  |        | X                                |
| Rxra   | 20181          | Nucrec   | X                     |          |                  |        |                                  |
| Nr2e1  | 21907          | Nucrec   | X                     |          |                  |        | X                                |
| Pou2f2 | 18987          | Pou      | X                     |          | X                |        | X                                |
| Rfx3   | 19726          | RFX      | X                     |          |                  |        | X                                |
| Peg3   | 18616          | ZN C2H2  | X                     |          |                  |        | X                                |
| Zic3   | 22773          | ZN C2H2  | X                     |          |                  |        | X                                |
| Zic4   | 22774          | ZN C2H2  | X                     |          |                  |        |                                  |
| Chd4   | 107932         | ZN PHD   | X                     |          |                  |        |                                  |
| Sim1   | 20464          | bHLH     |                       | X        |                  |        |                                  |
| Baz1b  | 22385          | Bromo    |                       | X        |                  |        | X                                |
| Cited1 | 12705          | Cited    |                       | X        |                  |        | X                                |
| Dlx6   | 13396          | Homeobox |                       | X        |                  |        | X                                |
| Isl1   | 16392          | Homeobox |                       | X        |                  |        | X                                |
| Lhx5   | 16873          | Homeobox |                       | X        |                  |        | X                                |
| Otp    | 18420          | Homeobox |                       | X        | X                |        | X                                |
| Lmo1   | 109594         | LIM      |                       | X        |                  |        | X                                |
| Rxrg   | 20183          | Nucrec   |                       | X        |                  |        |                                  |
| Nr2f2  | 11819          | Nucrec   |                       | X        |                  |        | X                                |
| Pou3f1 | 18991          | Pou      |                       | X        |                  |        | X                                |
| Pou3f2 | 18992          | Pou      |                       | X        |                  |        |                                  |
| Stat5A | 20850          | Stat     |                       | X        |                  |        |                                  |
| Zdhhc2 | 70546          | ZN DHHC  |                       | X        |                  |        | X                                |

List of 58 transcription factors identified as within or directly adjacent to the SCN obtained from re-examination of a genome-scale transcription factor expression database (Gray et al., 2004) and other published work (\*Jean et al., 1999; Wang and Lufkin, 2000). Genes highlighted in grey were further assessed for precise expression within the SCN region. The last column represents those genes whose expression was further confirmed using either Genepaint (Visel et al., 2004) or Eurexpress (Diez-Roux et al., 2011). bHLH – basic helix-loop-helix, Bromo - Bromodomain, CITED – CREB-binding protein/p300-interacting transactivator with ED-rich tail HMG – high mobility group, Forkhead – Forkhead box, Nucrec – nuclear receptor, RFX – Regulatory factor X, STAT – signal transducer and activator of transcription, ZN C2H2 – Zinc finger type C2H2, ZN DHHC – Zinc finger DHHC domain-containing.

## Supplemental References

- Diez-Roux G, Banfi S, Sultan M, Geffers L, Anand S, Rozado D, Magen A, Canidio E, Pagani M, Peluso I, Lin-Marq N, Koch M, Bilio M, Cantiello I, Verde R, De Masi C, Bianchi SA, Cicchini J, Perroud E, Mehmeti S, Dagand E, Schrunner S, Nurnberger A, Schmidt K, Metz K, Zwingmann C, Brieske N, Springer C, Hernandez AM, Herzog S, Grabbe F, Sieverding C, Fischer B, Schrader K, Brockmeyer M, Dettmer S, Helbig C, Alunni V, Battaini MA, Mura C, Henrichsen CN, Garcia-Lopez R, Echevarria D, Puelles E, Garcia-Calero E, Kruse S, Uhr M, Kauck C, Feng G, Milyaev N, Ong CK, Kumar L, Lam M, Semple CA, Gyenesei A, Mundlos S, Radelof U, Lehrach H, Sarmientos P, Reymond A, Davidson DR, Dolle P, Antonarakis SE, Yaspo ML, Martinez S, Baldock RA, Eichele G, Ballabio A (2011) A high-resolution anatomical atlas of the transcriptome in the mouse embryo. *PLoS Biol* 9:e1000582.
- Gray PA, Fu H, Luo P, Zhao Q, Yu J, Ferrari A, Tenzen T, Yuk DI, Tsung EF, Cai Z, Alberta JA, Cheng LP, Liu Y, Stenman JM, Valerius MT, Billings N, Kim HA, Greenberg ME, McMahon AP, Rowitch DH, Stiles CD, Ma Q (2004) Mouse brain organization revealed through direct genome-scale TF expression analysis. *Science* 306:2255-2257.
- Jean D, Bernier G, Gruss P (1999) Six6 (Optx2) is a novel murine Six3-related homeobox gene that demarcates the presumptive pituitary/hypothalamic axis and the ventral optic stalk. *Mech Dev* 84:31-40.
- Lein ES, Hawrylycz MJ, Ao N, Ayres M, Bensinger A, Bernard A, Boe AF, Boguski MS, Brockway KS, Byrnes EJ, Chen L, Chen L, Chen TM, Chin MC, Chong J, Crook BE, Czaplinska A, Dang CN, Datta S, Dee NR, Desaki AL, Desta T, Diep E, Dolbeare TA, Donelan MJ, Dong HW, Dougherty JG, Duncan BJ, Ebbert AJ, Eichele G, Estin LK, Faber C, Facer BA, Fields R, Fischer SR, Fliss TP, Frensley C, Gates SN, Glattfelder KJ, Halverson KR, Hart MR, Hohmann JG, Howell MP, Jeung DP, Johnson RA, Karr PT, Kawal R, Kidney JM, Knapik RH, Kuan CL, Lake JH, Laramie AR, Larsen KD, Lau C, Lemon TA, Liang AJ, Liu Y, Luong LT, Michaels J, Morgan JJ, Morgan RJ, Mortrud MT, Mosqueda NF, Ng LL, Ng R, Orta GJ, Overly CC, Pak TH, Parry SE, Pathak SD, Pearson OC, Puchalski RB, Riley ZL, Rockett HR, Rowland SA, Royall JJ, Ruiz MJ, Sarno NR, Schaffnit K, Shapovalova NV, Svisay T, Slaughterbeck CR, Smith SC, Smith KA, Smith BI, Sodt AJ, Stewart NN, Stumpf KR, Sunkin SM, Sutram M, Tam A, Teemer CD, Thaller C, Thompson CL, Varnam LR, Visel A, Whitlock RM, Wohnoutka PE, Wolkey CK, Wong VY, et al. (2007) Genome-wide atlas of gene expression in the adult mouse brain. *Nature* 445:168-176.
- Menger GJ, Lu K, Thomas T, Cassone VM, Earnest DJ (2005) Circadian profiling of the transcriptome in immortalized rat SCN cells. *Physiol Genomics* 21:370-381.
- Rivkees SA, Weaver DR, Reppert SM (1992) Circadian and developmental regulation of Oct-2 gene expression in the suprachiasmatic nuclei. *Brain Res* 598:332-336.
- Schaeren-Wiemers N, Andre E, Kapfhammer JP, Becker-Andre M (1997) The expression pattern of the orphan nuclear receptor RORbeta in the developing and adult rat nervous system suggests a role in the processing of sensory information and in circadian rhythm. *Eur J Neurosci* 9:2687-2701.

- Visel A, Thaller C, Eichele G (2004) GenePaint.org: an atlas of gene expression patterns in the mouse embryo. *Nucleic Acids Res* 32:D552-556.
- Wang W, Lufkin T (2000) The murine Otp homeobox gene plays an essential role in the specification of neuronal cell lineages in the developing hypothalamus. *Dev Biol* 227:432-449.
